# Supplementary material for: Glaucoma Detection Using Support Vector Machine Method Based on Spectralis OCT
Source: MDPI journal article supplement (doi:10.3390/diagnostics12020391), 2022-02-03
Supplement: s1 [file s1]

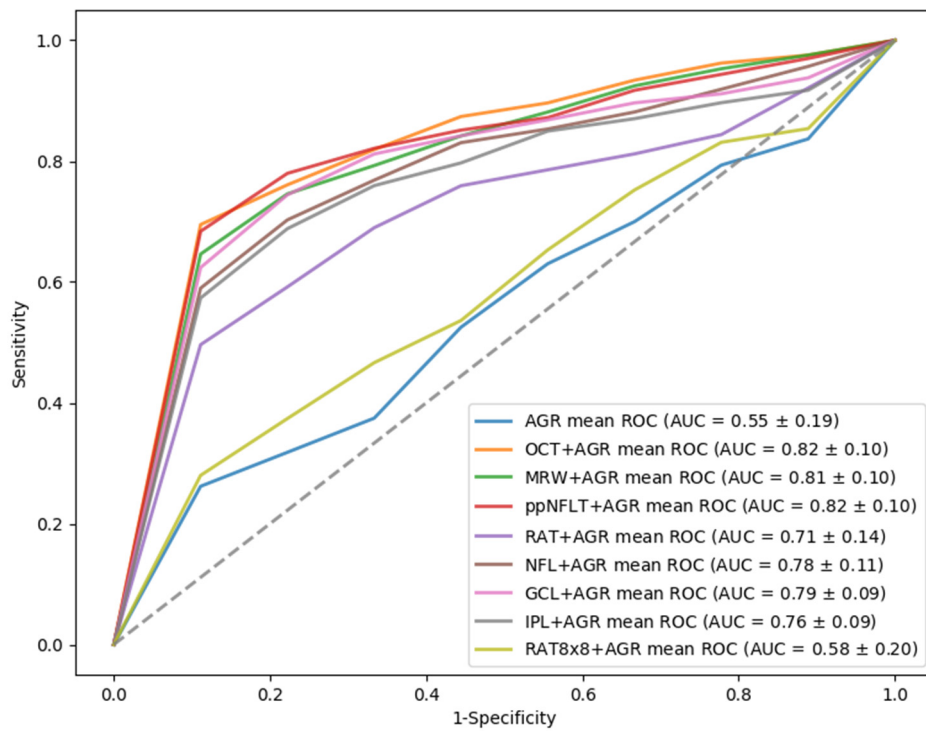

**Figure S1.** Receiver operating characteristic (ROC) curve of optical coherence tomography (OCT)-related features groups plus age, gender and refraction in differentiating normal from glaucomatous eyes

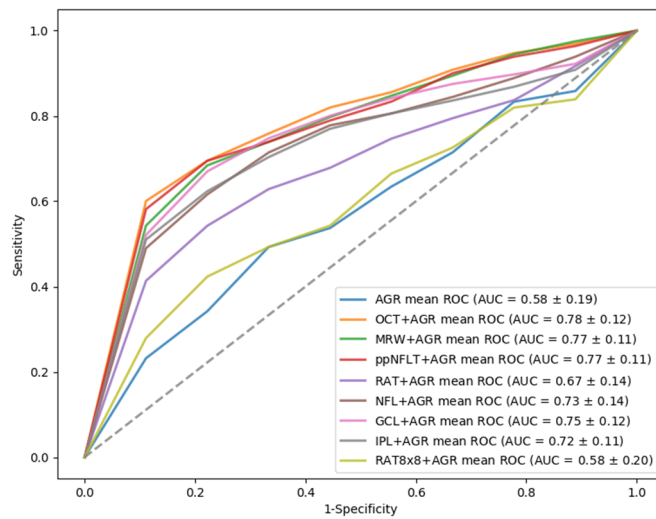

(a)

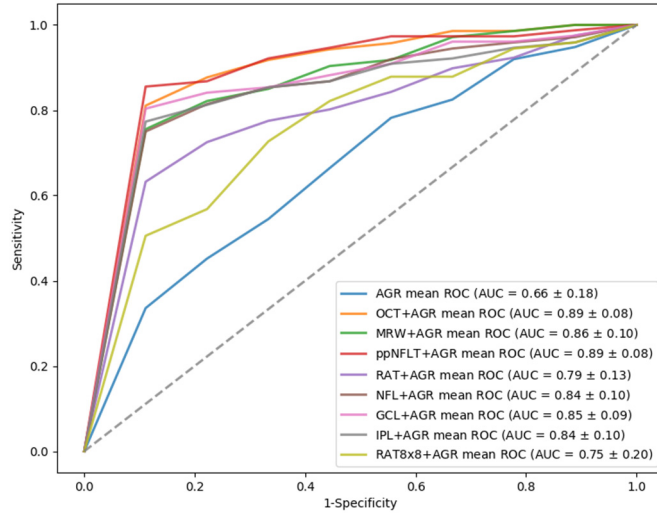

(b)

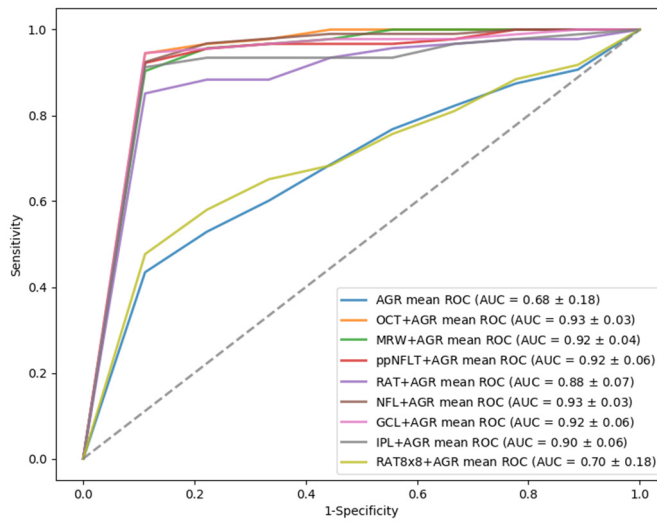

(c)

**Figure S2.** Receiver of characteristic (ROC) curve of optical coherence tomography (OCT)-related features groups plus age, gender and refraction in differentiating normal from (a) early, (b) moderate, and (c) severe glaucomatous eyes
